# Supplementary material for: Decreased Cortical Thickness and Local Gyrification in Individuals with Subjective Cognitive Impairment
Source: PubMed Central journal article supplement — Clin Psychopharmacol Neurosci. 2021 Nov 30;19(4):640–52. doi: 10.9758/cpn.2021.19.4.640 (PMC8553542; doi:10.9758/cpn.2021.19.4.640), 2021-11-30
Supplement: cpn-19-4-640-supple.pdf [file cpn-19-4-640-supple.pdf]

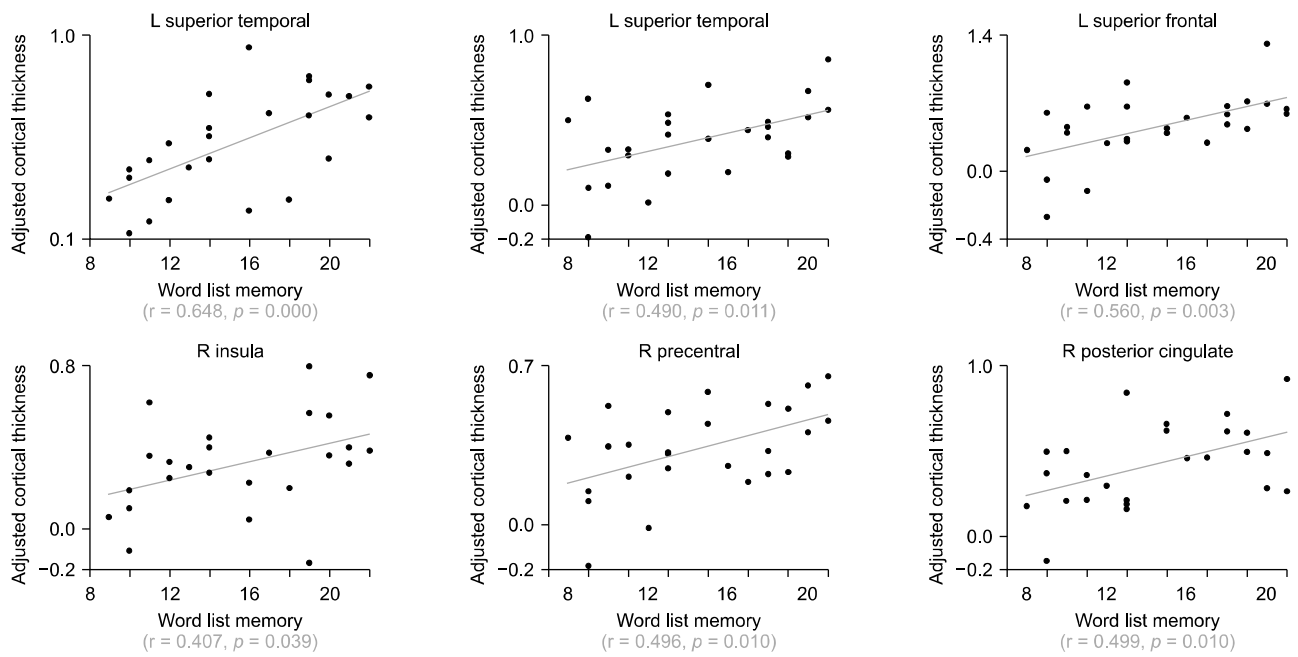

**Supplementary Fig. 1.** Correlation of word list memory, in the Consortium to Establish a Registry for Alzheimer’s Disease (CERAD) assessment, with the adjusted mean cortical thickness. Each subplot corresponds to a cluster in Table 3. We used partial correlation coefficients between the CERAD score and the average values of cortical measurements, controlling for age, sex, and education level using a general linear model, where the average value was obtained over each cluster.

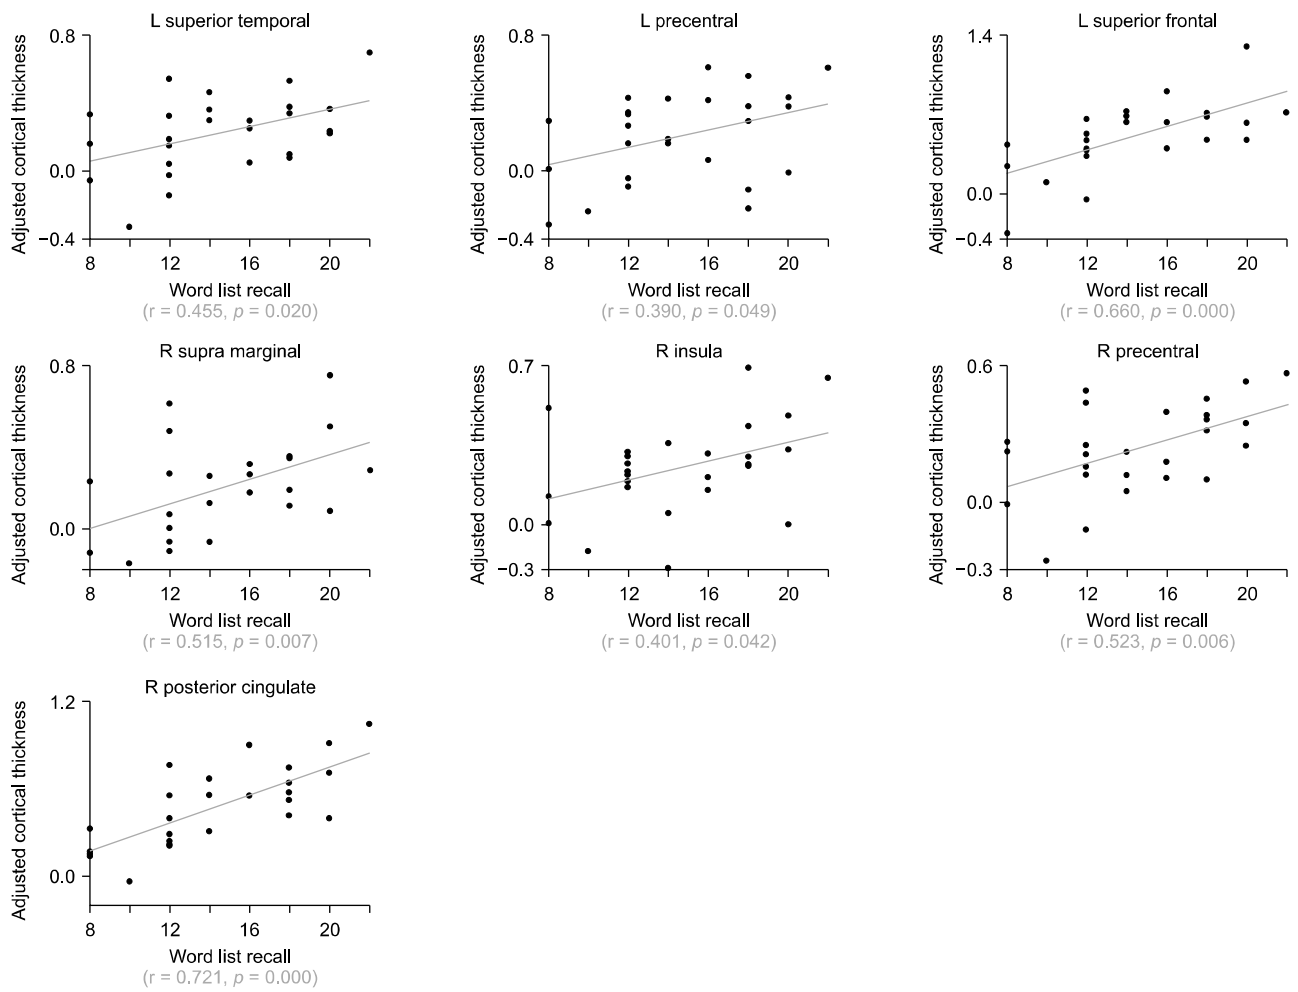

**Supplementary Fig. 2.** Correlation of word list recall, in the Consortium to Establish a Registry for Alzheimer's Disease (CERAD) assessment, with the adjusted mean cortical thickness. Each subplot corresponds to a cluster in Table 3. We used partial correlation coefficients between the CERAD score and the average values of cortical measurements, controlling for age, sex, and education level using a general linear model, where the average value was obtained over each cluster.

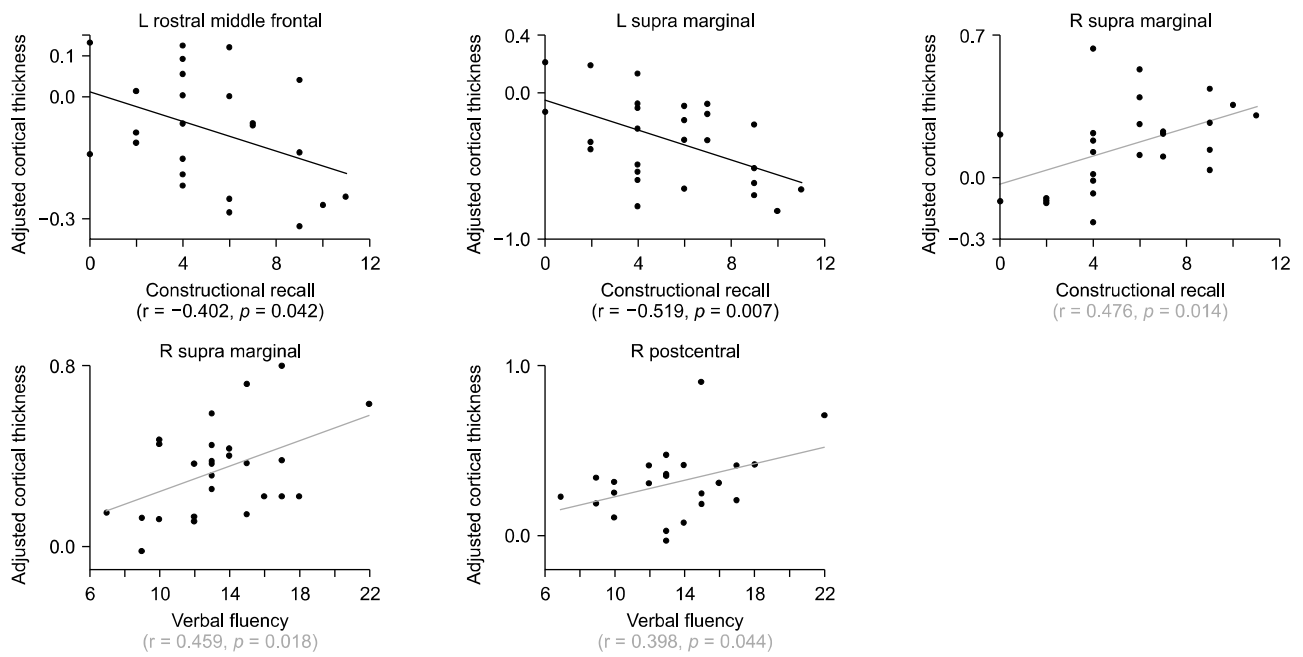

**Supplementary Fig. 3.** Correlation of constructional recall and verbal fluency, in the Consortium to Establish a Registry for Alzheimer’s Disease (CERAD) assessment, with the adjusted mean cortical thickness. Each subplot corresponds to a cluster in Table 3. We used partial correlation coefficients between the CERAD score and the average values of cortical measurements, controlling for age, sex, and education level using a general linear model, where the average value was obtained over each cluster.

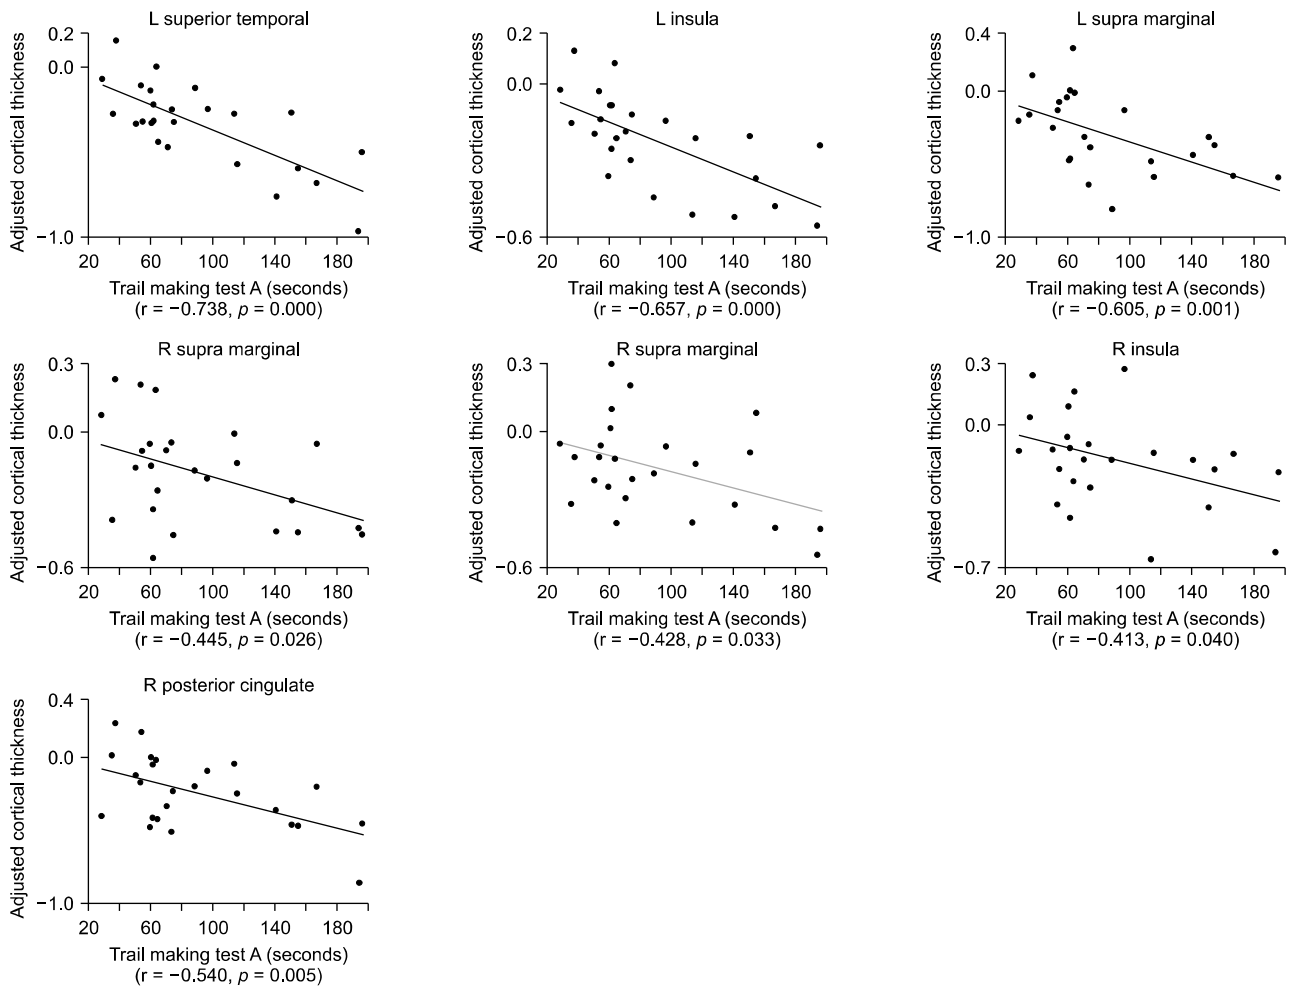

**Supplementary Fig. 4.** Correlation of trail making test A, in the Consortium to Establish a Registry for Alzheimer's Disease (CERAD) assessment, with the adjusted mean cortical thickness. Each subplot corresponds to a cluster in Table 3. We used partial correlation coefficients between the CERAD score and the average values of cortical measurements, controlling for age, sex, and education level using a general linear model, where the average value was obtained over each cluster.
